# Supplementary material for: Contributions to the Knowledge of Nemognathinae (Coleoptera: Meloidae) from China
Source: MDPI journal article supplement (doi:10.3390/insects15050338), 2024-05-08
Supplement: s1 [file s1]

**Table S1. Species, Specimen code, sample localities, genes, and GenBank accession numbers for the specimens included in this study.**

| Species                       | Specimen Code | Collection Data                                                                                              | COI      | 16S rRNA | 28S rRNA | CAD      | ITS2     |
|-------------------------------|---------------|--------------------------------------------------------------------------------------------------------------|----------|----------|----------|----------|----------|
| <i>Longizonitis semirubra</i> | M7G4          | China, Xizang, Yadong, Xiayadong, 2017.VI.23, Jian-Yue Qiu and Hao Xu leg.                                   | PP415776 | PP414785 | PP417814 | -        | PP440019 |
| <i>Sinostenoria yangi</i>     | M36C9         | China, Beijing, Fangshan District, Dashiwo Town, Nanhe Village (latrine in the eastern village), 2022.VII.12 | PP415775 | PP414784 | PP417813 | PP415777 | PP440018 |
